# Supplementary material for: Understanding Single-Molecule Magnet properties of lanthanide complexes from 4f orbital splitting
Source: Royal Society of Chemistry journal article supplement (doi:10.1039/d3dt04179d), 2023-12-19
Supplement: d3dt04179d1.pdf [file d3dt04179d1.pdf]

## Supporting Information

# Understanding Single Molecule Magnet Properties of Lanthanide Complexes by 4f Orbital Splitting

Yolimar Gil,<sup>a</sup> Daniel Aravena<sup>\*,b</sup>

<sup>a</sup> Facultad de Ciencias Químicas y Farmacéuticas, Universidad de Chile, Casilla 233, Santiago, Chile.

<sup>b</sup> Departamento de Química de los Materiales, Facultad de Química y Biología, Universidad de Santiago de Chile, Casilla 40, Correo 33, Santiago, Chile

email: daniel.aravena.p@usach.cl

|                                                                                                                                                                                  |    |
|----------------------------------------------------------------------------------------------------------------------------------------------------------------------------------|----|
| <b>Figure S1.</b> Energy splitting of the $[\text{Ln}^{\text{III}}\text{F}_2]^{1+}$ models calculated by the Ligand Field Stabilization Energy (LFSE) model and CASSCF(n,7)..... | 1  |
| <b>Table S1.</b> f-Orbital contributions for the ground term of $\text{Ce}^{\text{III}}$ .....                                                                                   | 3  |
| <b>Table S2.</b> f-Orbital contributions for the ground term of $\text{Pr}^{\text{III}}$ .....                                                                                   | 3  |
| <b>Table S3.</b> f-Orbital contributions for the ground term of $\text{Nd}^{\text{III}}$ .....                                                                                   | 4  |
| <b>Table S4.</b> f-Orbital contributions for the ground term of $\text{Pm}^{\text{III}}$ .....                                                                                   | 5  |
| <b>Table S5.</b> f-Orbital contributions for the ground term of $\text{Sm}^{\text{III}}$ .....                                                                                   | 6  |
| <b>Table S6.</b> f-Orbital contributions for the ground term of $\text{Eu}^{\text{III}}$ .....                                                                                   | 7  |
| <b>Table S7.</b> f-Orbital contributions for the ground term of $\text{Tb}^{\text{III}}$ .....                                                                                   | 8  |
| <b>Table S8.</b> f-Orbital contributions for the ground term of $\text{Dy}^{\text{III}}$ .....                                                                                   | 9  |
| <b>Table S9.</b> f-Orbital contributions for the ground term of $\text{Ho}^{\text{III}}$ .....                                                                                   | 10 |
| <b>Table S10.</b> f-Orbital contributions for the ground term of $\text{Er}^{\text{III}}$ .....                                                                                  | 11 |
| <b>Table S11.</b> f-Orbital contributions for the ground term of $\text{Tm}^{\text{III}}$ .....                                                                                  | 12 |
| <b>Table S12.</b> f-Orbital contributions for the ground term of $\text{Yb}^{\text{III}}$ .....                                                                                  | 12 |

**Figure S1.** Energy splitting of the  $[\text{Ln}^{\text{III}}\text{F}_2]^{1+}$  models calculated by the Ligand Field Stabilization Energy (LFSE) model and CASSCF(n,7).

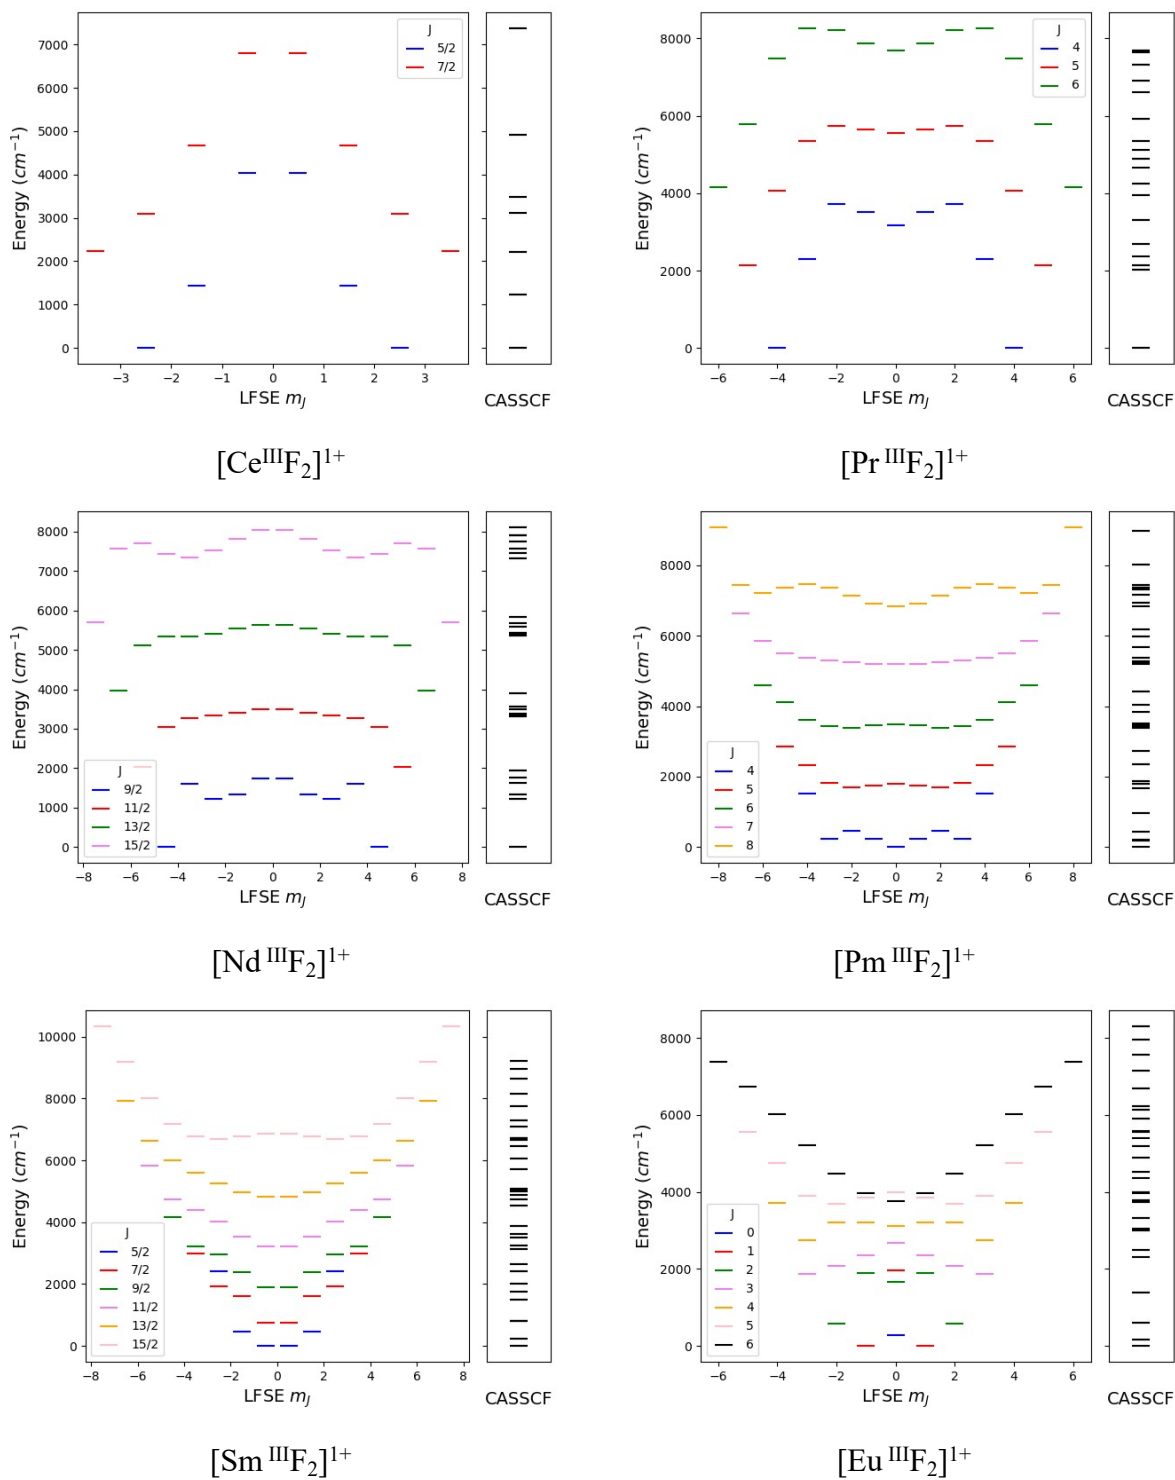

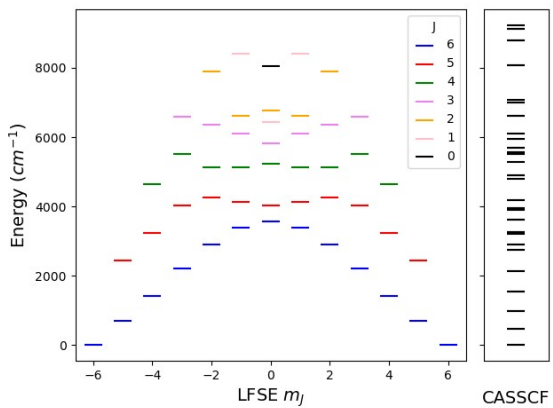

[Tb III F<sub>2</sub>]<sup>1+</sup>

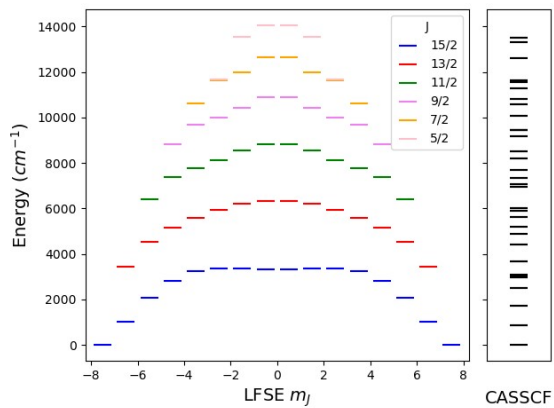

[Dy III F<sub>2</sub>]<sup>1+</sup>

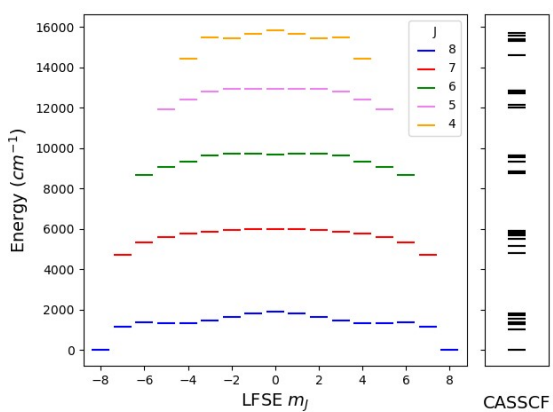

[Ho III F<sub>2</sub>]<sup>1+</sup>

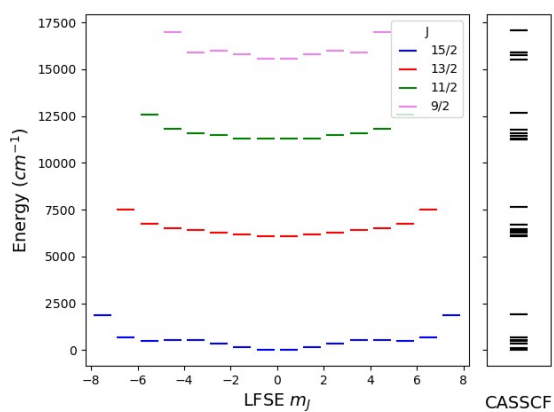

[Er III F<sub>2</sub>]<sup>1+</sup>

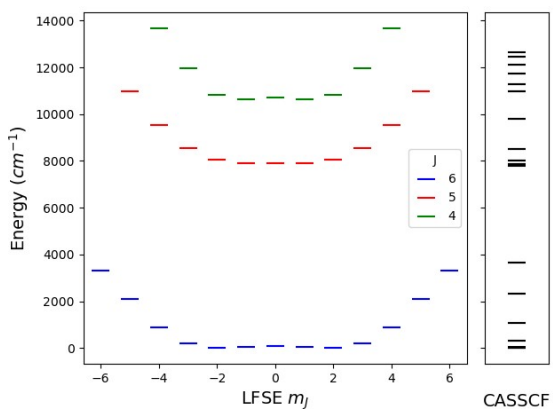

[Tm III F<sub>2</sub>]<sup>1+</sup>

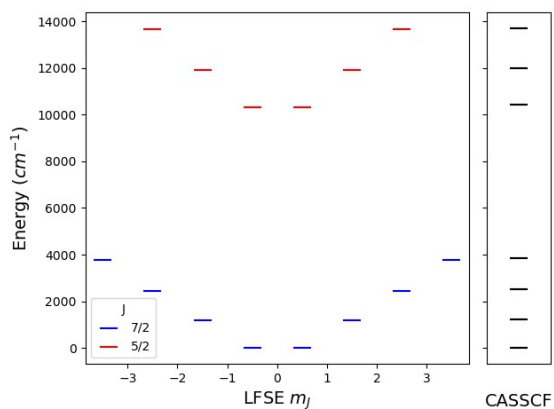

[Yb III F<sub>2</sub>]<sup>1+</sup>

**Table S1.** f-Orbital contributions for the ground term of Ce<sup>III</sup>

| Ln <sup>III</sup> | J   | m <sub>j</sub> | Orbitals |      |      |      |
|-------------------|-----|----------------|----------|------|------|------|
|                   |     |                | ±3       | ±2   | ±1   | 0    |
| Ce <sup>III</sup> | 5/2 | ±5/2           | 0.86     | 0.14 | 0.00 | 0.00 |
|                   |     | ±3/2           | 0.00     | 0.71 | 0.29 | 0.00 |
|                   |     | ±1/2           | 0.00     | 0.00 | 0.57 | 0.43 |
|                   | 7/2 | ±7/2           | 1.00     | 0.00 | 0.00 | 0.00 |
|                   |     | ±5/2           | 0.14     | 0.86 | 0.00 | 0.00 |
|                   |     | ±3/2           | 0.00     | 0.29 | 0.71 | 0.00 |
|                   |     | ±1/2           | 0.00     | 0.00 | 0.43 | 0.57 |

**Table S2.** f-Orbital contributions for the ground term of Pr<sup>III</sup>

| Ln <sup>III</sup> | J | m <sub>j</sub> | Orbitals |      |      |      |
|-------------------|---|----------------|----------|------|------|------|
|                   |   |                | ±3       | ±2   | ±1   | 0    |
| Pr <sup>III</sup> | 4 | ±4             | 0.99     | 0.82 | 0.17 | 0.01 |
|                   |   | ±3             | 0.87     | 0.13 | 0.77 | 0.23 |
|                   |   | ±2             | 0.48     | 0.51 | 0.39 | 0.62 |
|                   |   | ±1             | 0.19     | 0.73 | 0.73 | 0.36 |
|                   |   | 0              | 0.09     | 0.76 | 1.02 | 0.13 |
|                   | 5 | ±5             | 1.00     | 0.83 | 0.17 | 0.00 |
|                   |   | ±4             | 0.90     | 0.27 | 0.63 | 0.20 |
|                   |   | ±3             | 0.63     | 0.37 | 0.53 | 0.47 |
|                   |   | ±2             | 0.37     | 0.58 | 0.59 | 0.47 |
|                   |   | ±1             | 0.18     | 0.72 | 0.78 | 0.32 |
|                   | 6 | 0              | 0.12     | 0.76 | 0.88 | 0.24 |
|                   |   | ±6             | 1.00     | 1.00 | 0.00 | 0.00 |
|                   |   | ±5             | 1.00     | 0.17 | 0.83 | 0.00 |
|                   |   | ±4             | 0.77     | 0.24 | 0.53 | 0.45 |
|                   |   | ±3             | 0.50     | 0.50 | 0.36 | 0.64 |
|                   |   | ±2             | 0.27     | 0.68 | 0.57 | 0.48 |
|                   |   | ±1             | 0.13     | 0.75 | 0.90 | 0.23 |
|                   |   | 0              | 0.08     | 0.76 | 1.05 | 0.11 |

**Table S3.** f-Orbital contributions for the ground term of Nd<sup>III</sup>

| Ln <sup>III</sup> | J    | m <sub>j</sub> | Orbitals |      |      |      |
|-------------------|------|----------------|----------|------|------|------|
|                   |      |                | ±3       | ±2   | ±1   | 0    |
| Nd <sup>III</sup> | 9/2  | ±9/2           | 1.00     | 0.98 | 0.81 | 0.21 |
|                   |      | ±7/2           | 0.99     | 0.80 | 0.48 | 0.73 |
|                   |      | ±5/2           | 0.91     | 0.57 | 1.23 | 0.29 |
|                   |      | ±3/2           | 0.76     | 0.80 | 1.12 | 0.32 |
|                   |      | ±1/2           | 0.63     | 1.13 | 0.65 | 0.59 |
|                   | 11/2 | ±11/2          | 1.00     | 0.99 | 0.76 | 0.26 |
|                   |      | ±9/2           | 0.99     | 0.79 | 0.70 | 0.52 |
|                   |      | ±7/2           | 0.93     | 0.69 | 0.92 | 0.46 |
|                   |      | ±5/2           | 0.83     | 0.76 | 1.00 | 0.41 |
|                   |      | ±3/2           | 0.73     | 0.90 | 0.93 | 0.44 |
|                   | 13/2 | ±1/2           | 0.67     | 1.01 | 0.84 | 0.48 |
|                   |      | ±13/2          | 1.00     | 1.00 | 0.80 | 0.20 |
|                   |      | ±11/2          | 1.00     | 0.85 | 0.58 | 0.57 |
|                   |      | ±9/2           | 0.96     | 0.69 | 0.85 | 0.49 |
|                   |      | ±7/2           | 0.88     | 0.68 | 1.05 | 0.39 |
|                   | 15/2 | ±5/2           | 0.79     | 0.79 | 1.03 | 0.38 |
|                   |      | ±3/2           | 0.71     | 0.94 | 0.90 | 0.45 |
|                   |      | ±1/2           | 0.66     | 1.05 | 0.78 | 0.51 |
|                   |      | ±15/2          | 1.00     | 1.00 | 1.00 | 0.00 |
|                   |      | ±13/2          | 1.00     | 1.00 | 0.20 | 0.80 |
|                   |      | ±11/2          | 1.00     | 0.71 | 0.66 | 0.63 |
|                   |      | ±9/2           | 0.96     | 0.54 | 1.18 | 0.32 |
|                   |      | ±7/2           | 0.87     | 0.58 | 1.34 | 0.21 |
|                   | ±5/2 | 0.76           | 0.79     | 1.14 | 0.31 |      |
|                   | ±3/2 | 0.66           | 1.04     | 0.79 | 0.51 |      |
|                   | ±1/2 | 0.61           | 1.20     | 0.54 | 0.65 |      |

**Table S4.** f-Orbital contributions for the ground term of Pm<sup>III</sup>

| Ln <sup>III</sup> | J  | m <sub>j</sub> | Orbitals |      |      |      |      |
|-------------------|----|----------------|----------|------|------|------|------|
|                   |    |                | ±3       | ±2   | ±1   | 0    |      |
| Pm <sup>III</sup> | 4  | ±4             | 1.00     | 1.03 | 1.22 | 0.74 |      |
|                   |    | ±3             | 1.03     | 1.24 | 1.37 | 0.36 |      |
|                   |    | ±2             | 1.14     | 1.36 | 0.80 | 0.70 |      |
|                   |    | ±1             | 1.29     | 1.07 | 1.07 | 0.57 |      |
|                   |    | 0              | 1.37     | 0.87 | 1.35 | 0.41 |      |
|                   | 5  | ±5             | 1.00     | 1.04 | 1.30 | 0.66 |      |
|                   |    | ±4             | 1.03     | 1.27 | 1.07 | 0.63 |      |
|                   |    | ±3             | 1.12     | 1.20 | 1.19 | 0.49 |      |
|                   |    | ±2             | 1.21     | 1.13 | 1.17 | 0.48 |      |
|                   |    | ±1             | 1.27     | 1.10 | 1.06 | 0.57 |      |
|                   |    | 0              | 1.29     | 1.09 | 1.00 | 0.62 |      |
|                   | 6  | ±6             | 1.00     | 1.03 | 1.31 | 0.66 |      |
|                   |    | ±5             | 1.01     | 1.25 | 1.08 | 0.65 |      |
|                   |    | ±4             | 1.08     | 1.23 | 1.15 | 0.52 |      |
|                   |    | ±3             | 1.17     | 1.16 | 1.20 | 0.47 |      |
|                   |    | ±2             | 1.24     | 1.11 | 1.14 | 0.51 |      |
|                   |    | ±1             | 1.28     | 1.09 | 1.05 | 0.58 |      |
|                   |    | 0              | 1.29     | 1.09 | 1.00 | 0.61 |      |
|                   |    | 7              | ±7       | 1.00 | 1.00 | 1.25 | 0.75 |
|                   | ±6 |                | 1.00     | 1.18 | 1.29 | 0.54 |      |
|                   | ±5 |                | 1.04     | 1.27 | 1.16 | 0.52 |      |
|                   | ±4 |                | 1.11     | 1.27 | 1.07 | 0.55 |      |
|                   | ±3 |                | 1.19     | 1.20 | 1.04 | 0.57 |      |
|                   | ±2 |                | 1.26     | 1.11 | 1.07 | 0.56 |      |
|                   | ±1 |                | 1.31     | 1.03 | 1.12 | 0.54 |      |
|                   | 0  |                | 1.33     | 1.00 | 1.14 | 0.53 |      |
|                   | 8  |                | ±8       | 1.00 | 1.00 | 1.00 | 1.00 |
|                   |    |                | ±7       | 1.00 | 1.00 | 1.75 | 0.25 |
|                   |    |                | ±6       | 1.00 | 1.25 | 1.40 | 0.35 |
|                   |    | ±5             | 1.04     | 1.43 | 0.91 | 0.62 |      |
|                   |    | ±4             | 1.11     | 1.43 | 0.70 | 0.76 |      |
|                   |    | ±3             | 1.21     | 1.27 | 0.80 | 0.72 |      |
| ±2                |    | 1.30           | 1.06     | 1.08 | 0.57 |      |      |
| ±1                |    | 1.37           | 0.87     | 1.35 | 0.41 |      |      |
| 0                 |    | 1.39           | 0.80     | 1.46 | 0.35 |      |      |

**Table S5.** f-Orbital contributions for the ground term of Sm<sup>III</sup>

| Ln <sup>III</sup> | J    | m <sub>J</sub> | Orbitals |      |      |      |
|-------------------|------|----------------|----------|------|------|------|
|                   |      |                | ±3       | ±2   | ±1   | 0    |
| Sm <sup>III</sup> | 5/2  | ±5/2           | 1.08     | 1.37 | 1.65 | 0.88 |
|                   |      | ±3/2           | 1.43     | 1.60 | 1.36 | 0.61 |
|                   |      | ±1/2           | 1.77     | 1.32 | 1.27 | 0.64 |
|                   | 7/2  | ±7/2           | 1.10     | 1.47 | 1.58 | 0.85 |
|                   |      | ±5/2           | 1.42     | 1.30 | 1.63 | 0.65 |
|                   |      | ±3/2           | 1.55     | 1.54 | 1.05 | 0.87 |
|                   |      | ±1/2           | 1.64     | 1.40 | 1.45 | 0.49 |
|                   |      | ±9/2           | 1.08     | 1.50 | 1.55 | 0.86 |
|                   | 9/2  | ±7/2           | 1.36     | 1.28 | 1.73 | 0.63 |
|                   |      | ±5/2           | 1.49     | 1.47 | 1.20 | 0.85 |
|                   |      | ±3/2           | 1.57     | 1.48 | 1.20 | 0.72 |
|                   |      | ±1/2           | 1.63     | 1.41 | 1.46 | 0.50 |
|                   |      | ±11/2          | 1.04     | 1.47 | 1.57 | 0.93 |
|                   |      | ±9/2           | 1.27     | 1.32 | 1.79 | 0.62 |
|                   |      | ±7/2           | 1.42     | 1.46 | 1.34 | 0.78 |
|                   | 11/2 | ±5/2           | 1.53     | 1.51 | 1.15 | 0.80 |
|                   |      | ±3/2           | 1.63     | 1.44 | 1.27 | 0.65 |
|                   |      | ±1/2           | 1.68     | 1.37 | 1.45 | 0.51 |
|                   |      | ±13/2          | 1.00     | 1.33 | 1.67 | 1.00 |
|                   |      | ±11/2          | 1.15     | 1.44 | 1.72 | 0.69 |
|                   |      | ±9/2           | 1.31     | 1.54 | 1.46 | 0.69 |
|                   |      | ±7/2           | 1.46     | 1.55 | 1.27 | 0.72 |
|                   | 13/2 | ±5/2           | 1.60     | 1.47 | 1.23 | 0.69 |
|                   |      | ±3/2           | 1.71     | 1.37 | 1.29 | 0.63 |
|                   |      | ±1/2           | 1.77     | 1.30 | 1.36 | 0.58 |
|                   |      | ±15/2          | 1.00     | 1.00 | 2.00 | 1.00 |
|                   |      | ±13/2          | 1.00     | 1.67 | 1.33 | 1.00 |
|                   |      | ±11/2          | 1.14     | 1.76 | 1.38 | 0.71 |
| ±9/2              |      | 1.34           | 1.64     | 1.53 | 0.49 |      |
| 15/2              | ±7/2 | 1.54           | 1.48     | 1.53 | 0.45 |      |
|                   | ±5/2 | 1.70           | 1.35     | 1.39 | 0.55 |      |
|                   | ±3/2 | 1.82           | 1.28     | 1.20 | 0.70 |      |
|                   | ±1/2 | 1.88           | 1.25     | 1.06 | 0.80 |      |

**Table S6.** f-Orbital contributions for the ground term of Eu<sup>III</sup>

| Ln <sup>III</sup> | J | m <sub>j</sub> | Orbitals |      |      |      |
|-------------------|---|----------------|----------|------|------|------|
|                   |   |                | ±3       | ±2   | ±1   | 0    |
| Eu <sup>III</sup> | 0 | 0              | 1.71     | 1.71 | 1.71 | 0.86 |
|                   |   | 1              | ±1       | 1.89 | 1.71 | 1.61 |
|                   | 1 | 0              | 1.36     | 1.71 | 1.93 | 1.00 |
|                   |   | ±2             | 1.88     | 1.76 | 1.60 | 0.76 |
|                   |   | ±1             | 1.70     | 1.52 | 1.80 | 0.98 |
|                   | 2 | 0              | 1.40     | 2.00 | 1.79 | 0.81 |
|                   |   | ±3             | 1.83     | 1.67 | 1.67 | 0.83 |
|                   |   | ±2             | 1.67     | 1.83 | 1.67 | 0.83 |
|                   |   | ±1             | 1.67     | 1.67 | 1.83 | 0.83 |
|                   | 3 | 0              | 1.67     | 1.67 | 1.67 | 1.00 |
|                   |   | ±4             | 1.73     | 1.55 | 1.73 | 1.00 |
|                   |   | ±3             | 1.59     | 1.91 | 1.91 | 0.59 |
|                   |   | ±2             | 1.65     | 1.98 | 1.39 | 0.98 |
|                   |   | ±1             | 1.81     | 1.60 | 1.69 | 0.90 |
|                   | 4 | 0              | 1.88     | 1.36 | 1.99 | 0.77 |
|                   |   | ±5             | 1.50     | 1.50 | 2.00 | 1.00 |
|                   |   | ±4             | 1.50     | 2.00 | 1.50 | 1.00 |
|                   |   | ±3             | 1.67     | 1.83 | 1.83 | 0.67 |
|                   |   | ±2             | 1.83     | 1.67 | 1.83 | 0.67 |
|                   |   | ±1             | 1.94     | 1.62 | 1.56 | 0.88 |
|                   | 5 | 0              | 1.98     | 1.62 | 1.40 | 1.00 |
|                   |   | ±6             | 1.00     | 2.00 | 2.00 | 1.00 |
|                   |   | ±5             | 1.50     | 1.50 | 2.00 | 1.00 |
|                   |   | ±4             | 1.77     | 1.45 | 1.77 | 1.00 |
|                   |   | ±3             | 1.91     | 1.59 | 1.59 | 0.91 |
|                   |   | ±2             | 1.97     | 1.76 | 1.52 | 0.76 |
|                   |   | ±1             | 1.99     | 1.88 | 1.51 | 0.62 |
|                   |   | 0              | 2.00     | 1.92 | 1.51 | 0.57 |



**Table S7.** f-Orbital contributions for the ground term of Tb<sup>III</sup>

| Ln <sup>III</sup> | J  | m <sub>j</sub> | Orbitals |      |      |      |
|-------------------|----|----------------|----------|------|------|------|
|                   |    |                | ±3       | ±2   | ±1   | 0    |
| Tb <sup>III</sup> | 6  | ±6             | 3.00     | 2.00 | 2.00 | 1.00 |
|                   |    | ±5             | 2.50     | 2.50 | 2.00 | 1.00 |
|                   |    | ±4             | 2.23     | 2.55 | 2.23 | 1.00 |
|                   |    | ±3             | 2.09     | 2.41 | 2.41 | 1.09 |
|                   |    | ±2             | 2.03     | 2.24 | 2.48 | 1.24 |
|                   |    | ±1             | 2.01     | 2.12 | 2.49 | 1.38 |
|                   |    | 0              | 2.00     | 2.08 | 2.49 | 1.43 |
|                   | 5  | ±5             | 2.50     | 2.50 | 2.00 | 1.00 |
|                   |    | ±4             | 2.50     | 2.00 | 2.50 | 1.00 |
|                   |    | ±3             | 2.33     | 2.17 | 2.17 | 1.33 |
|                   |    | ±2             | 2.17     | 2.33 | 2.17 | 1.33 |
|                   |    | ±1             | 2.06     | 2.38 | 2.44 | 1.12 |
|                   |    | 0              | 2.02     | 2.38 | 2.60 | 1.00 |
|                   |    | 4              | ±4       | 2.27 | 2.45 | 2.27 |
|                   | ±3 |                | 2.41     | 2.09 | 2.09 | 1.41 |
|                   | ±2 |                | 2.35     | 2.02 | 2.61 | 1.02 |
|                   | ±1 |                | 2.19     | 2.40 | 2.31 | 1.10 |
|                   | 0  |                | 2.12     | 2.64 | 2.01 | 1.23 |
|                   | 3  | ±3             | 2.17     | 2.33 | 2.33 | 1.17 |
|                   |    | ±2             | 2.33     | 2.17 | 2.33 | 1.17 |
|                   |    | ±1             | 2.33     | 2.33 | 2.17 | 1.17 |
|                   |    | 0              | 2.33     | 2.33 | 2.33 | 1.00 |
|                   | 2  | ±2             | 2.12     | 2.24 | 2.40 | 1.24 |
|                   |    | ±1             | 2.30     | 2.48 | 2.20 | 1.02 |
|                   |    | 0              | 2.60     | 2.00 | 2.21 | 1.19 |
|                   | 1  | ±1             | 2.11     | 2.29 | 2.39 | 1.21 |
|                   |    | 0              | 2.64     | 2.29 | 2.07 | 1.00 |
|                   | 0  | 0              | 2.29     | 2.29 | 2.29 | 1.14 |

**Table S8.** f-Orbital contributions for the ground term of Dy<sup>III</sup>

| Ln <sup>III</sup> | J    | m <sub>j</sub> | Orbitals |      |      |      |      |
|-------------------|------|----------------|----------|------|------|------|------|
|                   |      |                | ±3       | ±2   | ±1   | 0    |      |
| Dy <sup>III</sup> | 15/2 | ±15/2          | 3.00     | 3.00 | 2.00 | 1.00 |      |
|                   |      | ±13/2          | 3.00     | 2.33 | 2.67 | 1.00 |      |
|                   |      | ±11/2          | 2.86     | 2.24 | 2.62 | 1.29 |      |
|                   |      | ±9/2           | 2.66     | 2.36 | 2.47 | 1.51 |      |
|                   |      | ±7/2           | 2.46     | 2.52 | 2.47 | 1.55 |      |
|                   |      | ±5/2           | 2.29     | 2.65 | 2.61 | 1.45 |      |
|                   |      | ±3/2           | 2.18     | 2.72 | 2.80 | 1.30 |      |
|                   |      | ±1/2           | 2.12     | 2.75 | 2.94 | 1.20 |      |
|                   | 13/2 | ±13/2          | 3.00     | 2.67 | 2.33 | 1.00 |      |
|                   |      | ±11/2          | 2.85     | 2.56 | 2.28 | 1.31 |      |
|                   |      | ±9/2           | 2.69     | 2.46 | 2.54 | 1.31 |      |
|                   |      | ±7/2           | 2.54     | 2.45 | 2.73 | 1.28 |      |
|                   |      | ±5/2           | 2.40     | 2.53 | 2.77 | 1.31 |      |
|                   |      | ±3/2           | 2.29     | 2.63 | 2.71 | 1.37 |      |
|                   |      | ±1/2           | 2.23     | 2.70 | 2.64 | 1.42 |      |
|                   |      | 11/2           | ±11/2    | 2.96 | 2.53 | 2.43 | 1.07 |
|                   | ±9/2 |                | 2.73     | 2.68 | 2.21 | 1.38 |      |
|                   | ±7/2 |                | 2.58     | 2.54 | 2.66 | 1.22 |      |
|                   | ±5/2 |                | 2.47     | 2.49 | 2.85 | 1.20 |      |
|                   | ±3/2 |                | 2.37     | 2.55 | 2.72 | 1.34 |      |
|                   | ±1/2 |                | 2.32     | 2.63 | 2.55 | 1.49 |      |
|                   | 9/2  |                | ±9/2     | 2.92 | 2.50 | 2.45 | 1.14 |
|                   |      |                | ±7/2     | 2.64 | 2.72 | 2.27 | 1.37 |
|                   |      | ±5/2           | 2.51     | 2.53 | 2.80 | 1.15 |      |
|                   |      | ±3/2           | 2.41     | 2.50 | 2.78 | 1.27 |      |
|                   |      | ±1/2           | 2.36     | 2.59 | 2.54 | 1.50 |      |
|                   | 7/2  | ±7/2           | 2.90     | 2.53 | 2.42 | 1.15 |      |
|                   |      | ±5/2           | 2.58     | 2.70 | 2.37 | 1.35 |      |
| ±3/2              |      | 2.45           | 2.46     | 2.95 | 1.13 |      |      |
| ±1/2              |      | 2.35           | 2.59     | 2.53 | 1.50 |      |      |
| 5/2               |      | ±5/2           | 2.91     | 2.62 | 2.34 | 1.11 |      |
|                   | ±3/2 | 2.57           | 2.40     | 2.64 | 1.39 |      |      |
|                   | ±1/2 | 2.23           | 2.68     | 2.73 | 1.36 |      |      |

**Table S9.** f-Orbital contributions for the ground term of Ho<sup>III</sup>

| Ln <sup>III</sup> | J | m <sub>j</sub> | Orbitals |      |      |      |
|-------------------|---|----------------|----------|------|------|------|
|                   |   |                | ±3       | ±2   | ±1   | 0    |
| Ho <sup>III</sup> | 8 | ±8             | 3.00     | 3.00 | 3.00 | 1.00 |
|                   |   | ±7             | 3.00     | 3.00 | 2.25 | 1.75 |
|                   |   | ±6             | 3.00     | 2.75 | 2.60 | 1.65 |
|                   |   | ±5             | 2.96     | 2.57 | 3.09 | 1.38 |
|                   |   | ±4             | 2.89     | 2.57 | 3.30 | 1.23 |
|                   |   | ±3             | 2.79     | 2.73 | 3.20 | 1.28 |
|                   |   | ±2             | 2.70     | 2.94 | 2.92 | 1.43 |
|                   |   | ±1             | 2.63     | 3.13 | 2.65 | 1.59 |
|                   | 7 | 0              | 2.61     | 3.20 | 2.54 | 1.65 |
|                   |   | ±7             | 3.00     | 3.00 | 2.75 | 1.25 |
|                   |   | ±6             | 3.00     | 2.82 | 2.71 | 1.46 |
|                   |   | ±5             | 2.96     | 2.73 | 2.84 | 1.48 |
|                   |   | ±4             | 2.89     | 2.73 | 2.93 | 1.45 |
|                   |   | ±3             | 2.81     | 2.80 | 2.96 | 1.43 |
|                   |   | ±2             | 2.74     | 2.89 | 2.93 | 1.44 |
|                   |   | ±1             | 2.69     | 2.97 | 2.88 | 1.46 |
|                   | 6 | 0              | 2.67     | 3.00 | 2.86 | 1.47 |
|                   |   | ±6             | 3.00     | 2.97 | 2.69 | 1.34 |
|                   |   | ±5             | 2.99     | 2.75 | 2.92 | 1.35 |
|                   |   | ±4             | 2.90     | 2.75 | 2.83 | 1.47 |
|                   |   | ±3             | 2.83     | 2.84 | 2.80 | 1.53 |
|                   |   | ±2             | 2.76     | 2.89 | 2.86 | 1.49 |
|                   |   | ±1             | 2.72     | 2.91 | 2.95 | 1.42 |
|                   |   | 0              | 2.71     | 2.91 | 3.00 | 1.39 |
|                   | 5 | ±5             | 3.00     | 2.96 | 2.70 | 1.34 |
|                   |   | ±4             | 2.97     | 2.73 | 2.93 | 1.37 |
|                   |   | ±3             | 2.88     | 2.80 | 2.81 | 1.51 |
|                   |   | ±2             | 2.78     | 2.87 | 2.82 | 1.51 |
|                   |   | ±1             | 2.73     | 2.90 | 2.94 | 1.43 |
|                   |   | 0              | 2.71     | 2.91 | 3.00 | 1.38 |
|                   | 4 | ±4             | 2.99     | 2.96 | 2.77 | 1.26 |
|                   |   | ±3             | 2.97     | 2.76 | 2.63 | 1.64 |
| ±2                |   | 2.86           | 2.64     | 3.20 | 1.30 |      |
| ±1                |   | 2.71           | 2.93     | 2.93 | 1.43 |      |
| 0                 |   | 2.63           | 3.13     | 2.65 | 1.59 |      |

**Table S10.** f-Orbital contributions for the ground term of Er<sup>III</sup>

| Ln <sup>III</sup> | J    | m <sub>j</sub> | Orbitals |      |      |      |      |
|-------------------|------|----------------|----------|------|------|------|------|
|                   |      |                | ±3       | ±2   | ±1   | 0    |      |
| Er <sup>III</sup> | 15/2 | ±15/2          | 3.00     | 3.00 | 3.00 | 2.00 |      |
|                   |      | ±13/2          | 3.00     | 3.00 | 3.80 | 1.20 |      |
|                   |      | ±11/2          | 3.00     | 3.29 | 3.34 | 1.37 |      |
|                   |      | ±9/2           | 3.04     | 3.46 | 2.82 | 1.68 |      |
|                   |      | ±7/2           | 3.13     | 3.42 | 2.66 | 1.79 |      |
|                   |      | ±5/2           | 3.24     | 3.21 | 2.86 | 1.69 |      |
|                   |      | ±3/2           | 3.34     | 2.96 | 3.21 | 1.49 |      |
|                   |      | ±1/2           | 3.39     | 2.80 | 3.46 | 1.35 |      |
|                   | 13/2 | ±13/2          | 3.00     | 3.00 | 3.20 | 1.80 |      |
|                   |      | ±11/2          | 3.00     | 3.15 | 3.42 | 1.43 |      |
|                   |      | ±9/2           | 3.04     | 3.31 | 3.15 | 1.51 |      |
|                   |      | ±7/2           | 3.12     | 3.32 | 2.95 | 1.61 |      |
|                   |      | ±5/2           | 3.21     | 3.21 | 2.97 | 1.62 |      |
|                   |      | ±3/2           | 3.29     | 3.06 | 3.10 | 1.55 |      |
|                   |      | ±1/2           | 3.34     | 2.95 | 3.22 | 1.49 |      |
|                   |      | 11/2           | ±11/2    | 3.00 | 3.01 | 3.24 | 1.74 |
|                   | ±9/2 |                | 3.01     | 3.21 | 3.30 | 1.48 |      |
|                   | ±7/2 |                | 3.07     | 3.31 | 3.08 | 1.54 |      |
|                   | ±5/2 |                | 3.17     | 3.24 | 3.00 | 1.59 |      |
|                   | ±3/2 |                | 3.26     | 3.09 | 3.06 | 1.56 |      |
|                   | ±1/2 |                | 3.33     | 2.99 | 3.16 | 1.52 |      |
|                   | 9/2  |                | ±9/2     | 3.00 | 3.02 | 3.19 | 1.79 |
|                   |      |                | ±7/2     | 3.01 | 3.20 | 3.52 | 1.27 |
|                   |      | ±5/2           | 3.09     | 3.43 | 2.77 | 1.71 |      |
|                   |      | ±3/2           | 3.24     | 3.20 | 2.88 | 1.68 |      |
|                   |      | ±1/2           | 3.37     | 2.87 | 3.35 | 1.41 |      |

**Table S11.** f-Orbital contributions for the ground term of Tm<sup>III</sup>

| Ln <sup>III</sup> | J | m <sub>j</sub> | Orbitals |      |      |      |
|-------------------|---|----------------|----------|------|------|------|
|                   |   |                | ±3       | ±2   | ±1   | 0    |
| Tm <sup>III</sup> | 6 | ±6             | 3.00     | 3.00 | 4.00 | 2.00 |
|                   |   | ±5             | 3.00     | 3.83 | 3.17 | 2.00 |
|                   |   | ±4             | 3.23     | 3.76 | 3.47 | 1.55 |
|                   |   | ±3             | 3.50     | 3.50 | 3.64 | 1.36 |
|                   |   | ±2             | 3.73     | 3.32 | 3.43 | 1.52 |
|                   |   | ±1             | 3.87     | 3.25 | 3.10 | 1.77 |
|                   |   | 0              | 3.92     | 3.24 | 2.95 | 1.89 |
|                   | 5 | ±5             | 3.00     | 3.17 | 3.83 | 2.00 |
|                   |   | ±4             | 3.10     | 3.73 | 3.37 | 1.80 |
|                   |   | ±3             | 3.37     | 3.63 | 3.47 | 1.53 |
|                   |   | ±2             | 3.63     | 3.42 | 3.41 | 1.53 |
|                   |   | ±1             | 3.82     | 3.28 | 3.22 | 1.68 |
|                   |   | 0              | 3.88     | 3.24 | 3.12 | 1.76 |
|                   | 4 | ±4             | 3.01     | 3.18 | 3.83 | 1.99 |
|                   |   | ±3             | 3.13     | 3.87 | 3.23 | 1.77 |
|                   |   | ±2             | 3.52     | 3.49 | 3.61 | 1.38 |
|                   |   | ±1             | 3.81     | 3.27 | 3.27 | 1.64 |
|                   |   | 0              | 3.91     | 3.24 | 2.98 | 1.87 |

**Table S12.** f-Orbital contributions for the ground term of Yb<sup>III</sup>

| Ln <sup>III</sup> | J   | m <sub>j</sub> | Orbitals |      |      |      |
|-------------------|-----|----------------|----------|------|------|------|
|                   |     |                | ±3       | ±2   | ±1   | 0    |
| Yb <sup>III</sup> | 7/2 | ±7/2           | 3.00     | 4.00 | 4.00 | 2.00 |
|                   |     | ±5/2           | 3.86     | 3.14 | 4.00 | 2.00 |
|                   |     | ±3/2           | 4.00     | 3.71 | 3.29 | 2.00 |
|                   |     | ±1/2           | 4.00     | 4.00 | 3.57 | 1.43 |
|                   | 5/2 | ±5/2           | 3.14     | 3.86 | 4.00 | 2.00 |
|                   |     | ±3/2           | 4.00     | 3.29 | 3.71 | 2.00 |
|                   |     | ±1/2           | 4.00     | 4.00 | 3.43 | 1.57 |
